# Supplementary material for: A Framework for Identifying and Prioritizing SNPs in Genes of the Hypothalamic- Pituitary-Gonadal Axis in Guzerat Cattle Using Amplicon-Based NGS
Source: Research Square preprint supplement (doi:10.21203/rs.3.rs-6547904/v1), 2025-05-19
Supplement: Supplementary file 1 [file 43d1dc908a2dd0ed63e46acf.xlsx]

## Sheet: Hoja 1
Gene	Number of non-synonymous changes	Bening	Potencially high impact	SNP position	Amino acid				Observations
					Reference	Chemical characteristic	Alternative	Chemical characteristic
AMH	1	aa 153		21.402.590	T	Polar (non-charged)	M	Non polar (aliphatic)	Both amino acids are present in the species.
CGA	2		aa 72	62.796.776	K	Polar (basic)	M	Non polar (aliphatic)	All species have K; M is exclusive to Guzerat.
			aa 74	62.796.778	T	Polar (non-charged)	M	Non polar (aliphatic)	All species have T; M is exclusive to Guzerat.
EGFR1	3		aa 1130	906.674	A	Non polar (aliphatic)	S	Polar (non-charged)	All species have A; S is exclusive to Guzerat.
		aa 1083		908.646	T	Polar (non-charged)	A	Non polar (aliphatic)	Both amino acids are present in the species.
			aa 328	964.085	K	Polar (basic)	N	Polar (non-charged)	All species have K; N is exclusive to Guzerat.
EIF2AK3	3		aa 310	47.481.041	V	Non polar (aliphatic)	L	Non polar (aliphatic)	All species have V; L is exclusive to Guzerat.
			aa 368	47.482.262	V	Non polar (aliphatic)	I	Non polar (aliphatic)	All species have V; I is exclusive to Guzerat.
			aa 903	47.498.903	C	Polar (non-charged)	Y	No polar (aromatico)	All species have C; Y is exclusive to Guzerat.
ESR1	1		aa 585	89.094.554	I	Non polar (aliphatic)	N	Polar (non-charged)	All species have I; V is present in C. dromedarius; N is exclusive to Guzerat.
FAS	3	aa 76		10.702.188	T	Polar (non-charged)	I	Non polar (aliphatic)	T is present in B. taurus; I is present in E. caballus, Bos sp., and Guzerat.
			aa 107	10702280	E	Polar (acidic)	K	Polar (basic)	All species have E or G; K is exclusive to Guzerat.
		aa 190		10.708.566	A	Non polar (aliphatic)	V	Non polar (aliphatic)	Most species have V; B. grunniens has A, and there are more aa in other species.
FST	2	aa 325		25.581.320	D	Polar (acidic)	E	Polar (acidic)	Bos species have D, and several species in the rest have E.
			aa 61	25.584.305	L	Non polar (aliphatic)	P	Non polar (aliphatic)	All species have L; P is exclusive to Guzerat.
GNRHR	2		aa 163	83.451.635	A	Non polar (aliphatic)	V	Non polar (aliphatic)	All species have A; V is exclusive to Guzerat.
			aa 13	83.452.085	H	Polar (basic)	L	Non polar (aliphatic)	All species have H; L is exclusive to Guzerat.
GRIA1	3	aa 959		65.002.376	S	Polar (non-charged)	N	Polar (non-charged)	B. taurus has N; the other species have S.
			aa 515	65.028.074	S	Polar (non-charged)	C	Polar (non-charged)	All species have S; C is exclusive to Guzerat.
			aa 555	65.079.638	F	No polar (aromatico)	Y	No polar (aromatico)	All species have Y; F is exclusive to Guzerat.
GSK3B	2		aa 368	64.677.758	D	Polar (acidic)	N	Polar (non-charged)	All species have N; D is exclusive to Guzerat.
			aa 367	64.677.760	R	Polar (basic)	Q	Polar (non-charged)	All species have R; Q is exclusive to Guzerat.
HCRT	1	aa 128		42.302.334	R	Polar (basic)	W	No polar (aromatico)	Several amino acids are present (R, P, Q, G).
HCRTR1	1	aa 59		122.106.427	V	Non polar (aliphatic)	I	Non polar (aliphatic)	All species have V; B. javanicus has I.
HELB	12		aa 1006	47.489.733	W	No polar (aromatico)	R	Polar (basic)	All species have W; R is exclusive to Guzerat.
			aa 570	47.509.291	S	Polar (non-charged)	F	No polar (aromatico)	All species have S; F is exclusive to Guzerat.
			aa 568	47.509.296	K	Polar (basic)	N	Polar (non-charged)	All species have K; N is exclusive to Guzerat.
			aa 568	47.509.298			stop		codon de stop
			aa 567	47.509.300	W	No polar (aromatico)	L	Non polar (aliphatic)	All species have W; L is exclusive to Guzerat.
			aa 566	47.509.304	P	Non polar (aliphatic)	S	Polar (non-charged)	All species have P; S is exclusive to Guzerat.
		aa 565		47.509.307	R	Polar (basic)	W	No polar (aromatico)	Several amino acids are present (R,M,K,S,G,T).
			aa 564	47.509.309	N	Polar (non-charged)	I	Non polar (aliphatic)	All species have N or D; I is exclusive to Guzerat.
			aa 549	47.509.355	V	Non polar (aliphatic)	F	No polar (aromatico)	All species have V; F is exclusive to Guzerat.
			aa 526	47.512.217	A	Non polar (aliphatic)	V	Non polar (aliphatic)	All species have A; V is exclusive to Guzerat.
			aa 336	47.512.787	D	Polar (acidic)	V	Non polar (aliphatic)	All species have D; R. norvegicus has T; V is exclusive to Guzerat.
		aa 188		47.516.396	D	Polar (acidic)	V	Non polar (aliphatic)	Several amino acids are present (D,G,E).
HIVEP	9		aa 155	104.615.616	E	Polar (acidic)	Q	Polar (non-charged)	All species have E; Q is exclusive to Guzerat.
			aa 170	104.615.663	Q	Polar (non-charged)	H	Polar (basic)	All species have Q; H is exclusive to Guzerat.
			aa 351	104.616.204	S	Polar (non-charged)	C	Polar (non-charged)	All species have S; C is exclusive to Guzerat.
			aa 1260	104.618.931			stop		codon de stop
			aa 1270	104.618.962	T	Polar (non-charged)	I	Non polar (aliphatic)	All species have T; I is exclusive to Guzerat.
			aa 1278	104.618.986	S	Polar (non-charged)	N	Polar (non-charged)	All species have S; N is exclusive to Guzerat.
		aa 1286		104.619.010	Q	Polar (non-charged)	P	Non polar (aliphatic)	Several amino acids are present (Q,P,R).
			aa 1813	104.662.726	T	Polar (non-charged)	M	Non polar (aliphatic)	All species have T; M is exclusive to Guzerat.
			aa 1814	104.662.728	G	Non polar (aliphatic)	W	No polar (aromatico)	All species have G; W is exclusive to Guzerat.
IGF1R	4		aa 594	8.041.031	I	Non polar (aliphatic)	N	Polar (non-charged)	All species have I; N is exclusive to Guzerat.
			aa 819	8.047.791	N	Polar (non-charged)	H	Polar (basic)	All species have N; H is exclusive to Guzerat.
			aa 957	8.053.903	V	Non polar (aliphatic)	I	Non polar (aliphatic)	All species have V; I is exclusive to Guzerat.
			aa 1095	8.059.198	R	Polar (basic)	G	Non polar (aliphatic)	All species have R; G is exclusive to Guzerat.
INHBC	1	aa 214		56.011.866	R	Polar (basic)	G	Non polar (aliphatic)	B. taurus and C. dromedarius have R; Guzerat and the rest species have G.
IRF2BPL	1		aa 200	88.238.064	A	Non polar (aliphatic)	E	Polar (acidic)	All species have A; E is exclusive to Guzerat.
ISL1	2		aa 85	27.739.740	G	Non polar (aliphatic)	R	Polar (basic)	All species have G; R is exclusive to Guzerat.
			aa 77	27.739.764	I	Non polar (aliphatic)	L	Non polar (aliphatic)	All species have I; L is exclusive to Guzerat.
KISS1	1	aa 85		1.958.082	S	Polar (non-charged)	P	Non polar (aliphatic)	Several amino acids are present (S,Q,R,P).
KISS1 R	1	aa 91		43.452.880	V	Non polar (aliphatic)	M	Non polar (aliphatic)	Several amino acids are present (V,L,P).
LEPR	5	aa 800		79.758.916	Y	No polar (aromatico)	H	Polar (basic)	Several amino acids are present (Y,N,H).
			aa 743	79.760.488	S	Polar (non-charged)	L	Non polar (aliphatic)	All species have S; L is exclusive to Guzerat.
			aa 604	79.767.763	C	Polar (non-charged)	F	No polar (aromatico)	All species have C; F is exclusive to Guzerat.
		aa 207		79.790.153	D	Polar (acidic)	N	Polar (non-charged)	Several amino acids are present (D,N,H,Y).
		aa 197		79.790.182	H	Polar (basic)	R	Polar (basic)	Several amino acids are present (H,R,Q,L).
LHB	1	aa 15		55.572.567	V	Non polar (aliphatic)	M	Non polar (aliphatic)	Several amino acids are present (V,L,M,A,P).
LHCGR	7	aa 509		30.978.687	N	Polar (non-charged)	S	Polar (non-charged)	Both amino acids are present in the species.
		aa 501		30.978.712	V	Non polar (aliphatic)	M	Non polar (aliphatic)	Several amino acids are present (V,M,T,L).
			aa 469	30.978.808	T	Polar (non-charged)	P	Non polar (aliphatic)	All species have T; P is exclusive to Guzerat.
		aa 412		30.978.979	L	Non polar (aliphatic)	I	Non polar (aliphatic)	All species have L; I is exclusive to Guzerat and B. grunniens.
		aa 390		30.979.044	R	Polar (basic)	H	Polar (basic)	Several amino acids are present (H,R,Q).
			aa 259	30.989.322	K	Polar (basic)	R	Polar (basic)	All species have K; R is exclusive to Guzerat.
		aa 241		30.989.376	T	Polar (non-charged)	S	Polar (non-charged)	Only B. taurus has T; the rest have S.
LHFPL1	1		aa 16	61.141.710	I	Non polar (aliphatic)	T	Polar (non-charged)	All species have T; I is exclusive to Guzerat.
NCOA2	2	aa 609		33.877.993	P	Non polar (aliphatic)	Q	Polar (non-charged)	P is present in B. taurus, B. bubalis, C. hircus, and O. aries; the rest have Q.
			aa 600	33.878.020	A	Non polar (aliphatic)	V	Non polar (aliphatic)	All species have A; V is exclusive to Guzerat.
NELL2	1		aa 643	35.846.228	D	Polar (acidic)	N	Polar (non-charged)	All species have D; E is exclusive to C. hircus, and N is exclusive to Guzerat.
NPY	1		aa 72	71.618.898	T	Polar (non-charged)	N	Polar (non-charged)	All species have T; N is exclusive to Guzerat, and A is exclusive to B. javanicus.
NRG1	2		aa 504	28.650.925	S	Polar (non-charged)	R	Polar (basic)	All species have S; R is exclusive to Guzerat.
			aa 516	28.650.959	P	Non polar (aliphatic)	T	Polar (non-charged)	All species have P; T is exclusive to Guzerat.
OPRK1	2		aa 186	21.723.401	S	Polar (non-charged)	F	No polar (aromatico)	All species have S; A is present in R. norvegicus, and F is exclusive to Guzerat.
			aa 160	21.723.479	V	Non polar (aliphatic)	G	Non polar (aliphatic)	All species have V; G is exclusive to Guzerat.
PLAG1	1		aa 308	23.331.118	I	Non polar (aliphatic)	N	Polar (non-charged)	All species have I; N is exclusive to Guzerat.
PLCZ	2	aa 337		91.363.574	A	Non polar (aliphatic)	P	Non polar (aliphatic)	Several amino acids are present (A,I,V,F,G).
		aa 343		91.363.593	V	Non polar (aliphatic)	E	Polar (acidic)	Several amino acids are present (V,S,L,E,W).
POU2F2	3	aa 128		51.145.503	M	Non polar (aliphatic)	I	Non polar (aliphatic)	All species have M; I is exclusive to Guzerat and R. norvegicus.
			aa 199	51.145.714	P	Non polar (aliphatic)	S	Polar (non-charged)	All species have P; S is exclusive to Guzerat.
			aa 200	51.145.718	P	Non polar (aliphatic)	Q	Polar (non-charged)	All species have P; Q is exclusive to Guzerat.
PRLR	5	aa 18		39.077.999	S	Polar (non-charged)	N	Polar (non-charged)	Several amino acids are present (S,N,Y,F,T).
			aa 374	39.098.953	F	No polar (aromatico)	S	Polar (non-charged)	All species have F; S is exclusive to Guzerat, and L is present in R. norvegicus.
		aa 378		39.098.964	E	Polar (acidic)	K	Polar (basic)	All species have K; E is exclusive to Guzerat and C. lupus familiaris.
			aa 439	39.099.147	V	Non polar (aliphatic)	M	Non polar (aliphatic)	All species have V; M is exclusive to Guzerat; I is present in E. caballus.
		aa 497		39.099.322	R	Polar (basic)	L	Non polar (aliphatic)	R is exclusive to B. taurus and B. javanicus; P is present in E. caballus; the rest have L.
PTGER2	2	aa 338		11.827.912	T	Polar (non-charged)	I	Non polar (aliphatic)	All species have T; A is present in O. aries, C. hircus, and R. norvegicus; I is exclusive to Guzerat.
			aa 330	11.827.936	L	Non polar (aliphatic)	S	Polar (non-charged)	All species have L; S is exclusive to Guzerat.
SP1	1		aa 776	26.609.598	L	Non polar (aliphatic)	M	Non polar (aliphatic)	All species have L; M is exclusive to Guzerat.
SPOCK	3		aa 429	48.367.085	D	Polar (acidic)	E	Polar (acidic)	All species have D; E is exclusive to Guzerat.
			aa 426	48.367.094	D	Polar (acidic)	E	Polar (acidic)	All species have D; E is exclusive to Guzerat.
		aa 229		48.401.258	N	Polar (non-charged)	K	Polar (basic)	Only B. taurus has N; the rest, including Guzerat, have K.
TAC3	2	aa 4		56.411.964	T	Polar (non-charged)	A	Non polar (aliphatic)	Several amino acids are present (T,M,A).
			aa 78	56.414.570	E	Polar (acidic)	G	Non polar (aliphatic)	All species have G; V is exclusive to B. javanicus; E is exclusive to Guzerat.
TAC3R	1		aa 372	21.441.512	C	Polar (non-charged)	G	Non polar (aliphatic)	All species have C; G is exclusive to Guzerat.
TGFbR1	2		aa 100	64.139.495	D	Polar (acidic)	N	Polar (non-charged)	All species have D; N is exclusive to Guzerat.
			aa 106	64.139.513	E	Polar (acidic)	K	Polar (basic)	All species have E; K is exclusive to Guzerat.
USP26	3	aa 803		16.900.888	D	Polar (acidic)	N	Polar (non-charged)	Several amino acids are present (D,E,N).
		aa 624		16.901.425	E	Polar (acidic)	K	Polar (basic)	Several amino acids are present (E,K,N,C).
		aa 40		16.903.176	I	Non polar (aliphatic)	N	Polar (non-charged)	Several amino acids are present (I,V,L).
